# Supplementary material for: A glucose responsive multifunctional hydrogel with antibacterial properties and real-time monitoring for diabetic wound treatment
Source: Royal Society of Chemistry journal article supplement (doi:10.1039/d4bm01097c), 2024-11-08
Supplement: d4bm01097c2.pdf [file d4bm01097c2.pdf]

## Supplementary data

# **A glucose responsive multifunctional hydrogel with antibacterial property and real-time monitoring for diabetic wound**

Zhifei Yang<sup>a,b</sup>, Jiayu Zhang<sup>b</sup>, Chen Wang<sup>a,b</sup>, Fangzheng Yu<sup>a,b</sup>, Wen Yu<sup>c\*</sup>, Zheng Zhao<sup>a,b\*</sup>

<sup>a</sup> Sanya Science and Education Innovation Park, Wuhan University of Technology, Sanya 572000, China.

<sup>b</sup> State Key Laboratory of Advanced Technology for Materials Synthesis and Processing, Wuhan University of Technology, Wuhan 430070, China.

<sup>c</sup> Hospital of Wuhan University of Technology, Wuhan 430070, China.

\* Corresponding authors: yuwen@whut.edu.cn (Wen Yu); zhengzhao@whut.edu.cn (Zheng Zhao).

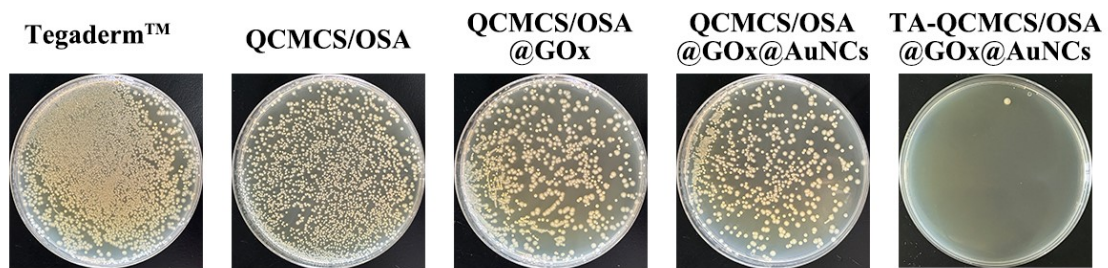

**Fig. S1.** Bacterial load in the wound tissue on day 6.

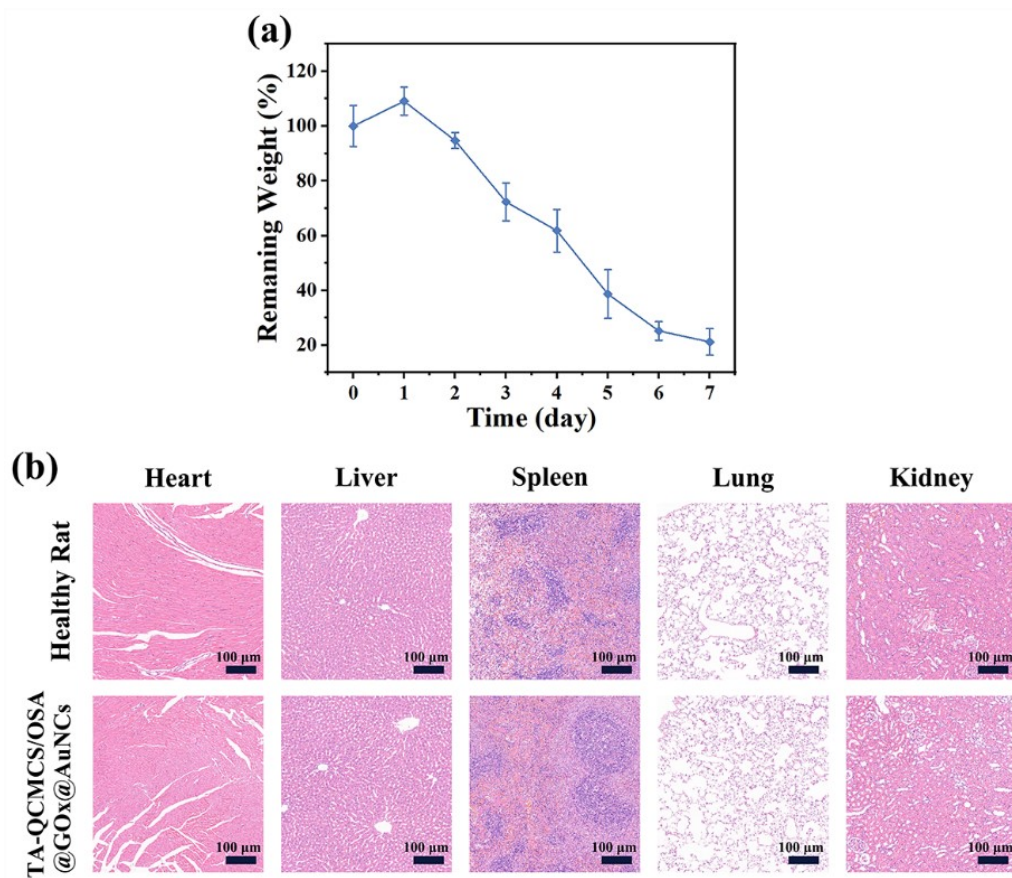

**Fig. S2.** (a) *In vitro* degradation of TA-QCMCS/OSA@GOx@AuNCs hydrogels in PBS. (b) Tissue sections of major organs treated with healthy rat and TA-QCMCS/OSA@GOx@AuNCs hydrogels (HE staining).
